# Supplementary material for: The Vascular Function of Resistance Arteries Depends on NADPH Oxidase 4 and Is Exacerbated by Perivascular Adipose Tissue
Source: MDPI journal article supplement (doi:10.3390/antiox13050503), 2024-04-23
Supplement: s1 [file s1]

## Supplementary Materials

# The Vascular Function of Resistance Arteries Depends on NADPH Oxidase 4 and Is Exacerbated by Perivascular Adipose Tissue

Patrick Diaba-Nuhoho <sup>†</sup>, Jennifer Mittag <sup>†</sup>, Coy Brunssen, Henning Morawietz <sup>\*</sup> and Heike Brendel <sup>\*</sup>

Division of Vascular Endothelium and Microcirculation, Department of Medicine III, University Hospital and Faculty of Medicine Carl Gustav Carus, TUD Dresden University of Technology, Fetscherstr. 74, 01307 Dresden, Germany

<sup>\*</sup> Correspondence: henning.morawietz@tu-dresden.de (H.M.); heike.brendel@uniklinikum-dresden.de (H.B.); Tel.: +49-351-4586625; (H.M.); +49-351-45816678 (H.B.); Fax: +49-351-4586354 (H.M.)

<sup>†</sup> These authors contributed equally to this study.

## Supplement Figures

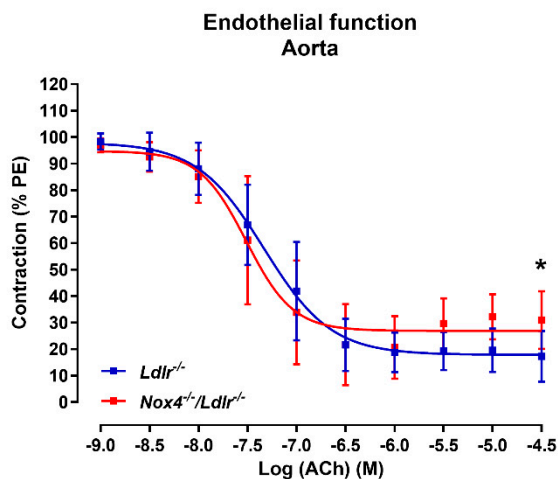

**Supplement Figure S1.** Endothelium-dependent vasorelaxation in the aorta of 26-week-old  $Ldlr^{-/-}$  and  $Nox4^{-/-}/Ldlr^{-/-}$  mice.

Concentration-response curve for acetylcholine (ACh) in aortic segments of  $Ldlr^{-/-}$  and  $Nox4^{-/-}/Ldlr^{-/-}$  mice ( $n \geq 9$ ). Statistics: repeated measures ANOVA;  $*p < 0.05$ .

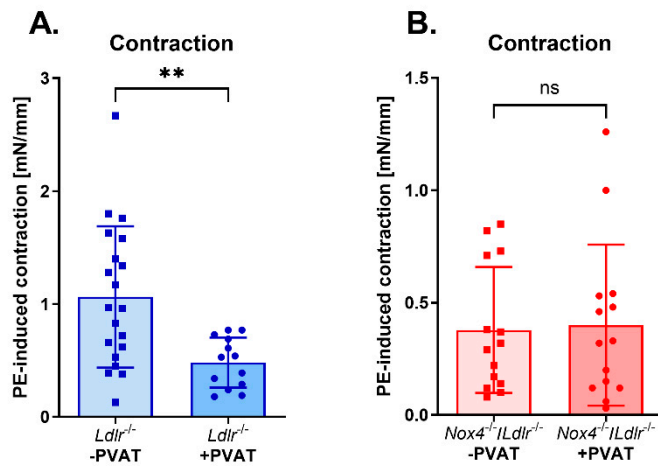

**Supplement Figure S2.** Phenylephrine-induced contraction in mesenteric arteries without and with perivascular adipose tissue of *Ldlr*<sup>-/-</sup> and *Nox4*<sup>-/-</sup>/*Ldlr*<sup>-/-</sup> mice.

(A) Phenylephrine (PE)-induced contraction in mesenteric arteries without (-PVAT) and with perivascular adipose tissue (+PVAT) of *Ldlr*<sup>-/-</sup> mice ( $n \geq 13$ ). (B) Phenylephrine (PE)-induced contraction in mesenteric arteries without (-PVAT) and with perivascular adipose tissue (+PVAT) of *Nox4*<sup>-/-</sup>/*Ldlr*<sup>-/-</sup> mice ( $n \geq 14$ ). Statistics: t test; \*\*  $p < 0.01$ , ns, not significant.

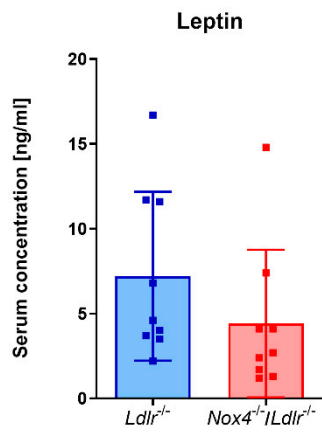

**Supplement Figure S3.** Leptin serum concentration in *Ldlr*<sup>-/-</sup> and *Nox4*<sup>-/-</sup>/*Ldlr*<sup>-/-</sup> mice. Leptin serum concentration in 26-week-old *Ldlr*<sup>-/-</sup> and *Nox4*<sup>-/-</sup>/*Ldlr*<sup>-/-</sup> mice. (*n* ≥ 9).

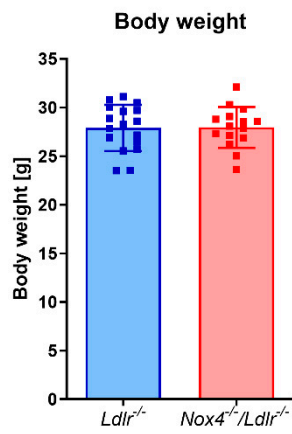

**Supplement Figure S4.** Body weight of *Ldlr*<sup>-/-</sup> and *Nox4*<sup>-/-</sup>/*Ldlr*<sup>-/-</sup> mice. Body weight of 26-week-old *Ldlr*<sup>-/-</sup> and *Nox4*<sup>-/-</sup>/*Ldlr*<sup>-/-</sup> mice ( $n \geq 15$ ).
